# Supplementary material for: Balibalosides, an Original Family of Glucosylated Sesterterpenes Produced by the Mediterranean Sponge Oscarella balibaloi
Source: MDPI journal article supplement (doi:10.3390/md11051477), 2013-05-06
Supplement: s2 [file s2]

marinedrugs-11-01477-s001.mol
  corina  04151403013D 1   1.00000     0.00000 
CORINA 3.49 0023  12.04.2013
 61 64  0  0  0  0  0  0  0  0999 V2000
   -4.1922   -5.4361    3.7454 C   0  0  0  0  0  0  0  0  0  0  0  0
   -4.4769   -5.1906    5.2048 C   0  0  0  0  0  0  0  0  0  0  0  0
   -3.5359   -4.7207    5.9857 C   0  0  0  0  0  0  0  0  0  0  0  0
   -2.2096   -4.3065    5.4023 C   0  0  0  0  0  0  0  0  0  0  0  0
   -1.9293   -2.8454    5.7595 C   0  0  0  0  0  0  0  0  0  0  0  0
   -0.6029   -2.4313    5.1760 C   0  0  0  0  0  0  0  0  0  0  0  0
   -0.5581   -1.8294    4.0133 C   0  0  0  0  0  0  0  0  0  0  0  0
    0.7689   -1.5843    3.3425 C   0  0  0  0  0  0  0  0  0  0  0  0
    0.7428   -2.1725    1.9303 C   0  0  0  0  0  0  0  0  0  0  0  0
    2.1064   -2.0350    1.3036 C   0  0  0  0  0  0  0  0  0  0  0  0
    2.9500   -3.0364    1.3444 C   0  0  0  0  0  0  0  0  0  0  0  0
    4.3620   -2.8526    0.8510 C   0  0  0  0  0  0  0  0  0  0  0  0
    5.3436   -3.2168    1.9666 C   0  0  0  0  0  0  0  0  0  0  0  0
    6.7531   -3.1490    1.4375 C   0  0  0  0  0  0  0  0  0  0  0  0
    7.4688   -2.0666    1.6173 C   0  0  0  0  0  0  0  0  0  0  0  0
    8.9130   -2.0383    1.1876 C   0  0  0  0  0  0  0  0  0  0  0  0
    9.1226   -0.9079    0.1780 C   0  0  0  0  0  0  0  0  0  0  0  0
   10.5667   -0.8795   -0.2517 C   0  0  0  0  0  0  0  0  0  0  0  0
   -5.8441   -5.4858    5.7658 C   0  0  0  0  0  0  0  0  0  0  0  0
    0.6718   -2.7095    5.9302 C   0  0  0  0  0  0  0  0  0  0  0  0
    0.5675   -2.1806    7.2536 O   0  0  0  0  0  0  0  0  0  0  0  0
    2.4994   -0.7456    0.6298 C   0  0  0  0  0  0  0  0  0  0  0  0
    7.3392   -4.3263    0.7017 C   0  0  0  0  0  0  0  0  0  0  0  0
   11.0836   -1.4620   -1.3305 C   0  0  0  0  0  0  0  0  0  0  0  0
   12.5234   -1.1954   -1.3886 C   0  0  0  0  0  0  0  0  0  0  0  0
   11.7023   -0.1787    0.4569 C   0  0  0  0  0  0  0  0  0  0  0  0
   12.8938   -0.4424   -0.3359 O   0  0  0  0  0  0  0  0  0  0  0  0
   13.2723   -1.5954   -2.2581 O   0  0  0  0  0  0  0  0  0  0  0  0
    0.7372   -3.8111   10.2938 C   0  0  0  0  0  0  0  0  0  0  0  0
    0.4215   -2.3196   10.1452 C   0  0  0  0  0  0  0  0  0  0  0  0
    1.5662   -1.6397    9.3878 C   0  0  0  0  0  0  0  0  0  0  0  0
    1.7543   -2.3313    8.0350 C   0  0  0  0  0  0  0  0  0  0  0  0
    2.0141   -3.7209    8.2440 O   0  0  0  0  0  0  0  0  0  0  0  0
    0.9573   -4.4189    8.9060 C   0  0  0  0  0  0  0  0  0  0  0  0
    1.4203    2.3780   11.4004 C   0  0  0  0  0  0  0  0  0  0  0  0
    0.8615    2.4972    9.9792 C   0  0  0  0  0  0  0  0  0  0  0  0
    1.9336    2.0483    8.9815 C   0  0  0  0  0  0  0  0  0  0  0  0
    2.3661    0.6187    9.3179 C   0  0  0  0  0  0  0  0  0  0  0  0
    2.8464    0.5718   10.6629 O   0  0  0  0  0  0  0  0  0  0  0  0
    1.8725    0.9357   11.6433 C   0  0  0  0  0  0  0  0  0  0  0  0
    1.2492   -0.2619    9.1797 O   0  0  0  0  0  0  0  0  0  0  0  0
    1.3322   -5.8953    9.0492 C   0  0  0  0  0  0  0  0  0  0  0  0
    1.4251   -6.4910    7.7536 O   0  0  0  0  0  0  0  0  0  0  0  0
    1.9201   -3.9730   11.0791 O   0  0  0  0  0  0  0  0  0  0  0  0
   -0.7965   -2.1592    9.4153 O   0  0  0  0  0  0  0  0  0  0  0  0
    2.4872    0.8221   13.0398 C   0  0  0  0  0  0  0  0  0  0  0  0
    2.7732   -0.5488   13.3242 O   0  0  0  0  0  0  0  0  0  0  0  0
    2.5348    3.2597   11.5509 O   0  0  0  0  0  0  0  0  0  0  0  0
   -0.2924    1.6644    9.8478 O   0  0  0  0  0  0  0  0  0  0  0  0
    1.0167    4.7691    5.5151 C   0  0  0  0  0  0  0  0  0  0  0  0
    0.5169    3.3549    5.2043 C   0  0  0  0  0  0  0  0  0  0  0  0
    1.6970    2.3809    5.2758 C   0  0  0  0  0  0  0  0  0  0  0  0
    2.3449    2.4772    6.6595 C   0  0  0  0  0  0  0  0  0  0  0  0
    2.7593    3.8240    6.8973 O   0  0  0  0  0  0  0  0  0  0  0  0
    1.6909    4.7731    6.8895 C   0  0  0  0  0  0  0  0  0  0  0  0
    1.3991    2.0864    7.6568 O   0  0  0  0  0  0  0  0  0  0  0  0
    2.2461    6.1686    7.1814 C   0  0  0  0  0  0  0  0  0  0  0  0
    2.7729    6.2035    8.5093 O   0  0  0  0  0  0  0  0  0  0  0  0
    1.9594    5.1719    4.5195 O   0  0  0  0  0  0  0  0  0  0  0  0
   -0.4737    2.9767    6.1623 O   0  0  0  0  0  0  0  0  0  0  0  0
    1.2298    1.0480    5.0589 O   0  0  0  0  0  0  0  0  0  0  0  0
  1  2  1  0      
  2  3  2  0      
  3  4  1  0      
  4  5  1  0      
  5  6  1  0      
  6  7  2  0      
  7  8  1  0      
  8  9  1  0      
  9 10  1  0      
 10 11  2  0      
 11 12  1  0      
 12 13  1  0      
 13 14  1  0      
 14 15  2  0      
 15 16  1  0      
 16 17  1  0      
 17 18  1  0      
  2 19  1  0      
  6 20  1  0      
 20 21  1  0      
 10 22  1  0      
 14 23  1  0      
 18 24  2  0      
 24 25  1  0      
 18 26  1  0      
 26 27  1  0      
 25 27  1  0      
 25 28  2  0      
 32 33  1  0      
 33 34  1  0      
 34 29  1  0      
 21 32  1  0      
 38 39  1  0      
 39 40  1  0      
 40 35  1  0      
 31 41  1  0      
 38 41  1  0      
 34 42  1  0      
 42 43  1  0      
 29 44  1  0      
 30 45  1  0      
 40 46  1  0      
 46 47  1  0      
 35 48  1  0      
 36 49  1  0      
 53 54  1  0      
 54 55  1  0      
 55 50  1  0      
 37 56  1  0      
 53 56  1  0      
 55 57  1  0      
 57 58  1  0      
 50 59  1  0      
 51 60  1  0      
 52 61  1  0      
 32 31  1  0      
 29 30  1  0      
 38 37  1  0      
 35 36  1  0      
 53 52  1  0      
 50 51  1  0      
 52 51  1  0      
 37 36  1  0      
 31 30  1  0      
M  END
$$$$
