# Supplementary material for: Balibalosides, an Original Family of Glucosylated Sesterterpenes Produced by the Mediterranean Sponge Oscarella balibaloi
Source: MDPI journal article supplement (doi:10.3390/md11051477), 2013-05-06
Supplement: s3 [file s3]

marinedrugs-11-01477-s001.mol
  ChemDraw02251409412D

 61 64  0  0  0  0  0  0  0  0999 V2000
   -5.8263    3.0188    0.0000 C   0  0  0  0  0  0  0  0  0  0  0  0
   -5.1118    2.6063    0.0000 C   0  0  0  0  0  0  0  0  0  0  0  0
   -4.3973    3.0188    0.0000 C   0  0  0  0  0  0  0  0  0  0  0  0
   -3.6829    2.6063    0.0000 C   0  0  0  0  0  0  0  0  0  0  0  0
   -2.9684    3.0188    0.0000 C   0  0  0  0  0  0  0  0  0  0  0  0
   -2.2539    2.6063    0.0000 C   0  0  0  0  0  0  0  0  0  0  0  0
   -1.5395    3.0188    0.0000 C   0  0  0  0  0  0  0  0  0  0  0  0
   -0.8250    2.6063    0.0000 C   0  0  0  0  0  0  0  0  0  0  0  0
   -0.1105    3.0188    0.0000 C   0  0  0  0  0  0  0  0  0  0  0  0
    0.6039    2.6063    0.0000 C   0  0  0  0  0  0  0  0  0  0  0  0
    1.3184    3.0188    0.0000 C   0  0  0  0  0  0  0  0  0  0  0  0
    2.0329    2.6063    0.0000 C   0  0  0  0  0  0  0  0  0  0  0  0
    2.7473    3.0188    0.0000 C   0  0  0  0  0  0  0  0  0  0  0  0
    3.4618    2.6063    0.0000 C   0  0  0  0  0  0  0  0  0  0  0  0
    4.1763    3.0188    0.0000 C   0  0  0  0  0  0  0  0  0  0  0  0
    4.8907    2.6063    0.0000 C   0  0  0  0  0  0  0  0  0  0  0  0
    5.6052    3.0188    0.0000 C   0  0  0  0  0  0  0  0  0  0  0  0
    6.3197    2.6063    0.0000 C   0  0  0  0  0  0  0  0  0  0  0  0
   -5.1118    1.7813    0.0000 C   0  0  0  0  0  0  0  0  0  0  0  0
   -2.2539    1.7813    0.0000 C   0  0  0  0  0  0  0  0  0  0  0  0
   -2.9684    1.3688    0.0000 O   0  0  0  0  0  0  0  0  0  0  0  0
    0.6039    1.7813    0.0000 C   0  0  0  0  0  0  0  0  0  0  0  0
    3.4618    1.7813    0.0000 C   0  0  0  0  0  0  0  0  0  0  0  0
    7.0341    3.0188    0.0000 C   0  0  0  0  0  0  0  0  0  0  0  0
    7.5668    2.4825    0.0000 C   0  0  0  0  0  0  0  0  0  0  0  0
    6.5355    1.8638    0.0000 C   0  0  0  0  0  0  0  0  0  0  0  0
    7.2574    1.8638    0.0000 O   0  0  0  0  0  0  0  0  0  0  0  0
    8.3636    2.2690    0.0000 O   0  0  0  0  0  0  0  0  0  0  0  0
   -5.6674    1.6273    0.0000 C   0  0  0  0  0  0  0  0  0  0  0  0
   -5.2550    0.9128    0.0000 C   0  0  0  0  0  0  0  0  0  0  0  0
   -4.4569    1.1218    0.0000 C   0  0  0  0  0  0  0  0  0  0  0  0
   -3.6636    0.9128    0.0000 C   0  0  0  0  0  0  0  0  0  0  0  0
   -4.0760    1.6273    0.0000 O   0  0  0  0  0  0  0  0  0  0  0  0
   -4.8742    1.4183    0.0000 C   0  0  0  0  0  0  0  0  0  0  0  0
   -6.0967   -0.0039    0.0000 C   0  0  0  0  0  0  0  0  0  0  0  0
   -5.6841   -0.7184    0.0000 C   0  0  0  0  0  0  0  0  0  0  0  0
   -4.8860   -0.5093    0.0000 C   0  0  0  0  0  0  0  0  0  0  0  0
   -4.0929   -0.7184    0.0000 C   0  0  0  0  0  0  0  0  0  0  0  0
   -4.5053   -0.0039    0.0000 O   0  0  0  0  0  0  0  0  0  0  0  0
   -5.3034   -0.2129    0.0000 C   0  0  0  0  0  0  0  0  0  0  0  0
   -3.6178    0.2679    0.0000 O   0  0  0  0  0  0  0  0  0  0  0  0
   -5.0030    1.6666    0.0000 C   0  0  0  0  0  0  0  0  0  0  0  0
   -4.0963    2.1901    0.0000 O   0  0  0  0  0  0  0  0  0  0  0  0
   -6.3819    1.2147    0.0000 O   0  0  0  0  0  0  0  0  0  0  0  0
   -6.0800    0.9128    0.0000 O   0  0  0  0  0  0  0  0  0  0  0  0
   -4.5890    0.1996    0.0000 C   0  0  0  0  0  0  0  0  0  0  0  0
   -5.4140    0.1996    0.0000 O   0  0  0  0  0  0  0  0  0  0  0  0
   -6.8112   -0.4164    0.0000 O   0  0  0  0  0  0  0  0  0  0  0  0
   -6.5091   -0.7184    0.0000 O   0  0  0  0  0  0  0  0  0  0  0  0
   -7.4569   -1.4708    0.0000 C   0  0  0  0  0  0  0  0  0  0  0  0
   -6.9334   -2.3774    0.0000 C   0  0  0  0  0  0  0  0  0  0  0  0
   -5.9207   -2.1121    0.0000 C   0  0  0  0  0  0  0  0  0  0  0  0
   -4.9140   -2.3774    0.0000 C   0  0  0  0  0  0  0  0  0  0  0  0
   -5.4374   -1.4708    0.0000 O   0  0  0  0  0  0  0  0  0  0  0  0
   -6.4503   -1.7360    0.0000 C   0  0  0  0  0  0  0  0  0  0  0  0
   -4.3626   -1.4160    0.0000 O   0  0  0  0  0  0  0  0  0  0  0  0
   -5.5435   -1.2126    0.0000 C   0  0  0  0  0  0  0  0  0  0  0  0
   -6.5905   -1.2126    0.0000 O   0  0  0  0  0  0  0  0  0  0  0  0
   -8.3636   -1.9943    0.0000 O   0  0  0  0  0  0  0  0  0  0  0  0
   -7.9803   -2.3774    0.0000 O   0  0  0  0  0  0  0  0  0  0  0  0
   -5.3972   -3.0188    0.0000 O   0  0  0  0  0  0  0  0  0  0  0  0
  1  2  1  0      
  2  3  2  0      
  3  4  1  0      
  4  5  1  0      
  5  6  1  0      
  6  7  2  0      
  7  8  1  0      
  8  9  1  0      
  9 10  1  0      
 10 11  2  0      
 11 12  1  0      
 12 13  1  0      
 13 14  1  0      
 14 15  2  0      
 15 16  1  0      
 16 17  1  0      
 17 18  1  0      
  2 19  1  0      
  6 20  1  0      
 20 21  1  0      
 10 22  1  0      
 14 23  1  0      
 18 24  2  0      
 24 25  1  0      
 18 26  1  0      
 26 27  1  0      
 25 27  1  0      
 25 28  2  0      
 32 33  1  0      
 33 34  1  0      
 34 29  1  0      
 21 32  1  0      
 38 39  1  0      
 39 40  1  0      
 40 35  1  0      
 31 41  1  0      
 38 41  1  0      
 34 42  1  0      
 42 43  1  0      
 29 44  1  0      
 30 45  1  0      
 40 46  1  0      
 46 47  1  0      
 35 48  1  0      
 36 49  1  0      
 53 54  1  0      
 54 55  1  0      
 55 50  1  0      
 37 56  1  0      
 53 56  1  0      
 55 57  1  0      
 57 58  1  0      
 50 59  1  0      
 51 60  1  0      
 52 61  1  0      
 32 31  1  1      
 29 30  1  1      
 38 37  1  1      
 35 36  1  1      
 53 52  1  1      
 50 51  1  1      
 52 51  1  1      
 37 36  1  1      
 31 30  1  1      
M  END
